# Supplementary material
Source: PubMed Central journal article supplement (PMC3869364)

A

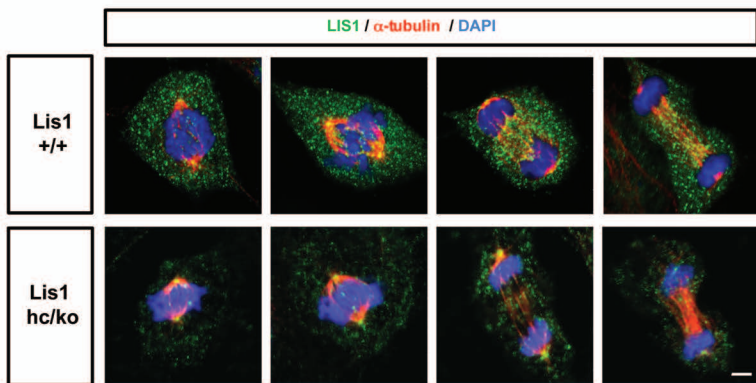

B

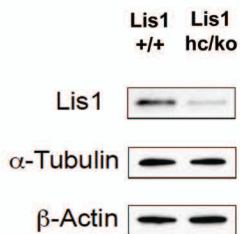

Supplement: supp_ddt436_ddt436supp_fig1.pdf [file supp_ddt436_ddt436supp_fig1.pdf]

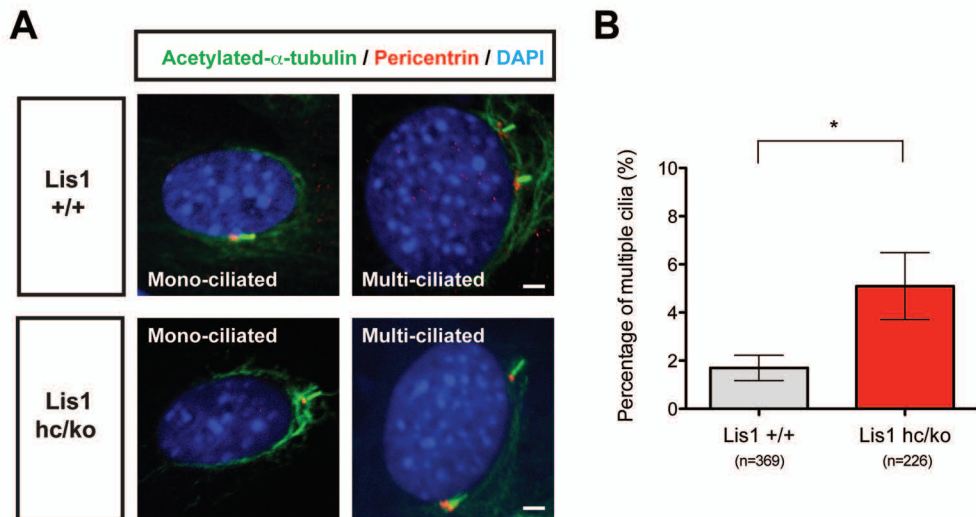

Supplement: supp_ddt436_ddt436supp_fig2.pdf [file supp_ddt436_ddt436supp_fig2.pdf]

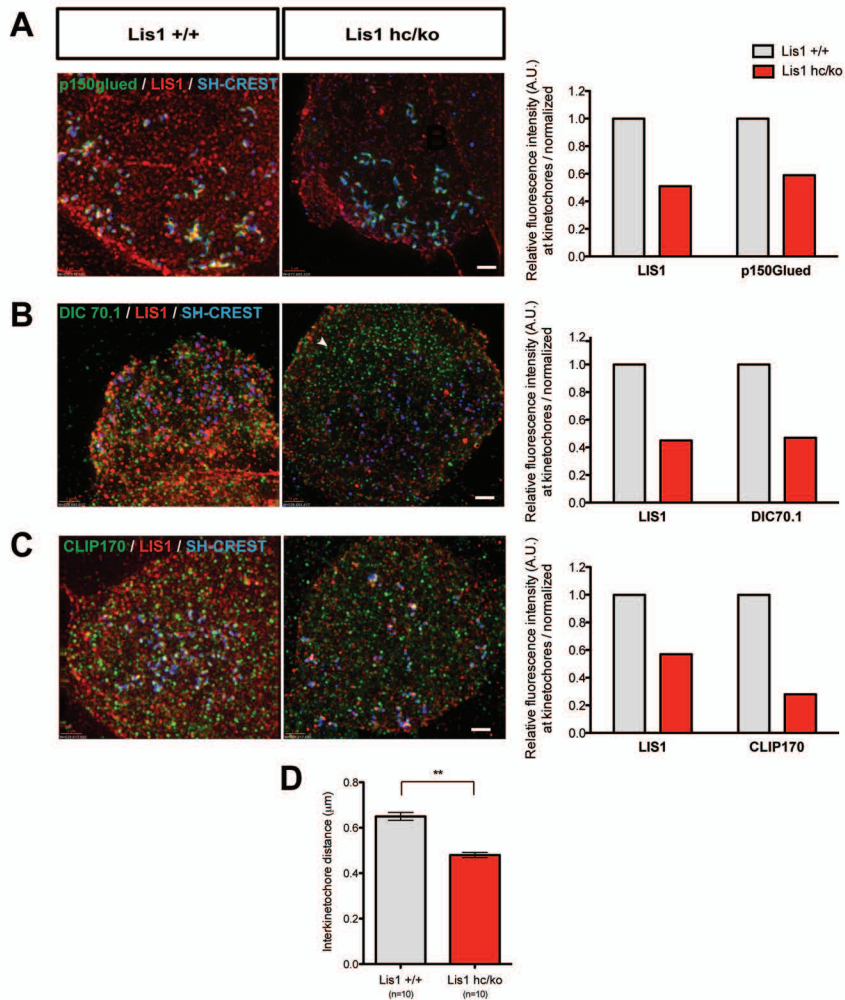

Supplement: supp_ddt436_ddt436supp_fig3.pdf [file supp_ddt436_ddt436supp_fig3.pdf]

**A**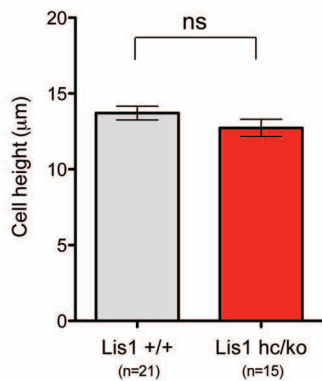**B**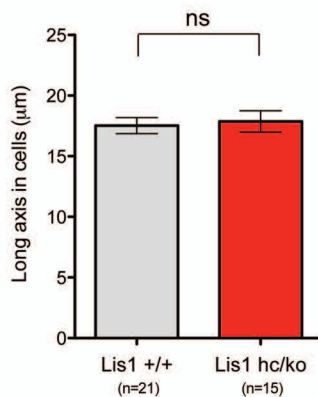

Supplement: supp_ddt436_ddt436supp_fig4.pdf [file supp_ddt436_ddt436supp_fig4.pdf]
